# Supplementary material for: Metformin activates AMP-activated protein kinase in primary human hepatocytes by decreasing cellular energy status
Source: Springer Nature journal article supplement (doi:10.1007/s00125-011-2311-5), 2011-09-22
Supplement: 125_2011_2311_MOESM1_ESM.pdf [file 125_2011_2311_MOESM1_ESM.pdf]

**ESM Table 1**

| <b>Primary antibody</b>                               | <b>Residue</b> | <b>Supplier</b> | <b>Reference</b> | <b>Dilution</b> | <b>Cross-species</b> |
|-------------------------------------------------------|----------------|-----------------|------------------|-----------------|----------------------|
| <b>β-Actin</b>                                        | -              | Sigma           | A5441            | 1:5000          | H, R, M              |
| <b>ACC</b>                                            | Ser79          | Cell Signaling  | #3661            | 1:1000          | H, R, M              |
| <b>AMPK<math>\alpha</math></b>                        | Thr172         | Cell Signaling  | #2535            | 1:1000          | H, R, M              |
| <b>AMPK<math>\alpha</math></b>                        | -              | Cell Signaling  | #2532            | 1:1000          | H, R, M              |
| <b>AMPK<math>\alpha</math>1</b>                       | -              | Kinasource      | AB-140           | 1:2000          | H, R, M              |
| <b>AMPK<math>\alpha</math>2 (1)</b>                   | -              | Kinasource      | AB-141           | 1:2000          | H, R, M              |
| <b>AMPK<math>\alpha</math>2 (2)</b>                   | -              | QED Bioscience  | 13010            | 1:500           | H, R, (M)            |
| <b>AMPK<math>\alpha</math>2 (3)</b>                   | -              | Santa Cruz      | Sc-19129         | 1:500           | H, R, M              |
| <b>AMPK<math>\beta</math>1+2</b>                      | -              | Cell Signaling  | #4150            | 1:1000          | H, R, M              |
| <b>AMPK<math>\beta</math>1</b>                        | -              | Cell Signaling  | #4182            | 1:1000          | H, R, M              |
| <b>AMPK<math>\beta</math>2</b>                        | -              | Cell Signaling  | #4148            | 1:1000          | H, R, M              |
| <b>AMPK<math>\gamma</math>1</b>                       | -              | AbCam           | ab32508          | 1:1000          | H, R, M              |
| <b>AMPK<math>\gamma</math>2<sup>full-length</sup></b> | -              | Cell Signaling  | #2536            | 1:1000          | H, R, M              |
| <b>AMPK<math>\gamma</math>2<sup>truncated</sup></b>   | -              | DG Hardie       | -                | 1:2500          | H, R, M              |
| <b>AMPK<math>\gamma</math>3</b>                       | -              | Santa Cruz      | sc-130687        | 1:500           | H, (R), M            |
