# Supplementary material for: Metformin activates AMP-activated protein kinase in primary human hepatocytes by decreasing cellular energy status
Source: Springer Nature journal article supplement (doi:10.1007/s00125-011-2311-5), 2011-09-22
Supplement: MOESM2 [file 8090340]

ESM Table 2

| Gene                     | Accession Number | Forward/reverse primers                                       | Amplicon Size (bp) | Primers Efficiency (%) |
|--------------------------|------------------|---------------------------------------------------------------|--------------------|------------------------|
| <b>Homo Sapiens</b>      |                  |                                                               |                    |                        |
| <i>PRKAA1</i>            | NM_006251        | 5'-TCGGCAAAGTGAAGGTTGGCA<br>5'-TCCTACCACATCAAGGCTCCGAA        | 98                 | 108                    |
| <i>PRKAA2</i>            | NM_006252        | 5'-GGTTGTTTCATCGAGACCTGAAACCA<br>5'-GGACCTGCATACAATCTGCCTGAGA | 177                | 92                     |
| <i>PRKAB1</i>            | NM_006253        | 5'-GCACGACCCTTCCGAGCCCATA<br>5'-AGCGCTCTTCGGGTTTGCAGAC        | 197                | 115                    |
| <i>PRKAB2</i>            | NM_005399        | 5'-ATCAGAGCCTGTGGTTACCAGTCA<br>5'-ATAAGGCCCTGGGGGTGAGCT       | 157                | 92                     |
| <i>PRKAG1</i>            | NM_002733        | 5'-TTGTGGGCATGCTGACCATCAC<br>5'-GAGACAGCATCAAACAAGCTGGCA      | 184                | 104                    |
| <i>PRKAG2</i> *          | NM_016203        | 5'-TGGAGTTCGAGGACGAAGCAGTAG<br>5'-TACTCTCCCACAGTGGCGCTG       | 192                | 105                    |
| <i>PRKAG3</i>            | NM_017431        | 5'-TCTTTGTGGACCGCGTGTGT<br>5'-TTTGCTGGGCAGCCAGGTGAATCA        | 105                | 93                     |
| <i>GAPDH</i>             | NM_002046        | 5'-CAGCCTCAAGATCATCAGCA<br>5'-TGTGGTCATGAGTCCTTCCA            | 106                | 107                    |
| <b>Rattus Norvegicus</b> |                  |                                                               |                    |                        |
| <i>Prkaa1</i>            | NM_019142        | 5'-ATCCGCAGAGAGATCCAGAA<br>5'-CGTCGACTCTCCTTTTCGTC            | 173                | 103                    |
| <i>Prkaa2</i>            | NM_023991        | 5'-CGGAGGTCATCTCAGGAAGGCTG<br>5'-ACGTGCTCATCGTCAACGGG         | 112                | 93                     |
| <i>Prkab1</i>            | NM_031976        | 5'-GCTGCAGGTCATCTTGAACA<br>5'-GAGCACCATCACTCCATCCT            | 124                | 115                    |
| <i>Prkab2</i>            | NM_022627        | 5'-CCCTCACCTCCTCCAAGTTAT<br>5'-GATGGGTTGCGCTAAGGA             | 146                | 95                     |
| <i>Prkag1</i>            | NM_013010        | 5'-AGCCCTACAGCACCGGTCACA<br>5'-ACGGTGAACCTCTGCTTCCACCA        | 106                | 95                     |
| <i>Prkag2</i>            | NM_184051        | 5'-GTCCATCGGTTGGTGGTAGT<br>5'-GGTGGTCATTCCGGTCTCTGT           | 131                | 112                    |
| <i>Prkag3</i>            | NM_001106921     | 5'-CGTGGGCCTCTACTCCCGCT<br>5'-GCCTATGCACCTGTTCCCGTGC          | 188                | 104                    |
| <i>Gapdh</i>             | NM_017008        | 5'-TGGTGGACCTCATGGCCTAC<br>5'-CAGCAACTGAGGGCCTCTCT            | 101                | 98                     |

\* This primers set allows to detect the three Prkag2 variants: a, encoding the longest isoform, and b/c, encoding shorter isoforms.

| Gene                | Accession Number | Forward/reverse primers                                    | Amplicon Size (bp) | Primers Efficiency (%) |
|---------------------|------------------|------------------------------------------------------------|--------------------|------------------------|
| <b>Mus Musculus</b> |                  |                                                            |                    |                        |
| <i>Prkaa1</i>       | NM_001013367     | 5'-TGGTGGGAAAAATCCGCCGGG<br>5'-CGGCTTTCCTTTTCGTCCAACCTTC   | 181                | 102                    |
| <i>Prkaa2</i>       | NM_178143        | 5'-ACCGAGCTATGAAGCAGCTGGGTT<br>5'-CCTCTGCTCCACCACCTCATCATC | 182                | 96                     |
| <i>Prkab1</i>       | NM_031869        | 5'-AGGACACGGGCATCTCTTGT<br>5'-GTGGTTCAGCATGACGTGGTT        | 65                 | 107                    |
| <i>Prkab2</i>       | NM_182997        | 5'-GGCCCACCGTTATCCGCTGGT<br>5'-ACCACAGGCTCTGACGGATCATG     | 196                | 104                    |
| <i>Prkag1</i>       | NM_016781        | 5'-ATGAGAAAGGGCGTGTGGTGGAC<br>5'-GGACCGATGCTGCAGGGCTTTT    | 116                | 104                    |
| <i>Prkag2*</i>      | NM_145401        | 5'-TCACACCAGCAGGTGCCAAACAG<br>5'-TGCGCGGGCGTCTACATTCAC     | 70                 | 96                     |
| <i>Prkag3</i>       | NM_153744        | 5'-GGGCATCGGCACATTCCGAGA<br>5'-TGGGCAGCCAGGTGAATGACATCA    | 168                | 101                    |
| <i>Gapdh</i>        | NM_008084        | 5'-TGCACCACCAACTGCTTAGC<br>5'-GGCATGGACTGTGGTCATGAG        | 87                 | 106                    |

\* This primers set allows to detect the three Prkag2 variants: 1, encoding the longest isoform, and 2/3, encoding shorter isoforms.
