# Supplementary material for: Metformin activates AMP-activated protein kinase in primary human hepatocytes by decreasing cellular energy status
Source: Springer Nature journal article supplement (doi:10.1007/s00125-011-2311-5), 2011-09-22
Supplement: MOESM3 [file 8090340]

## ESM Figure 1

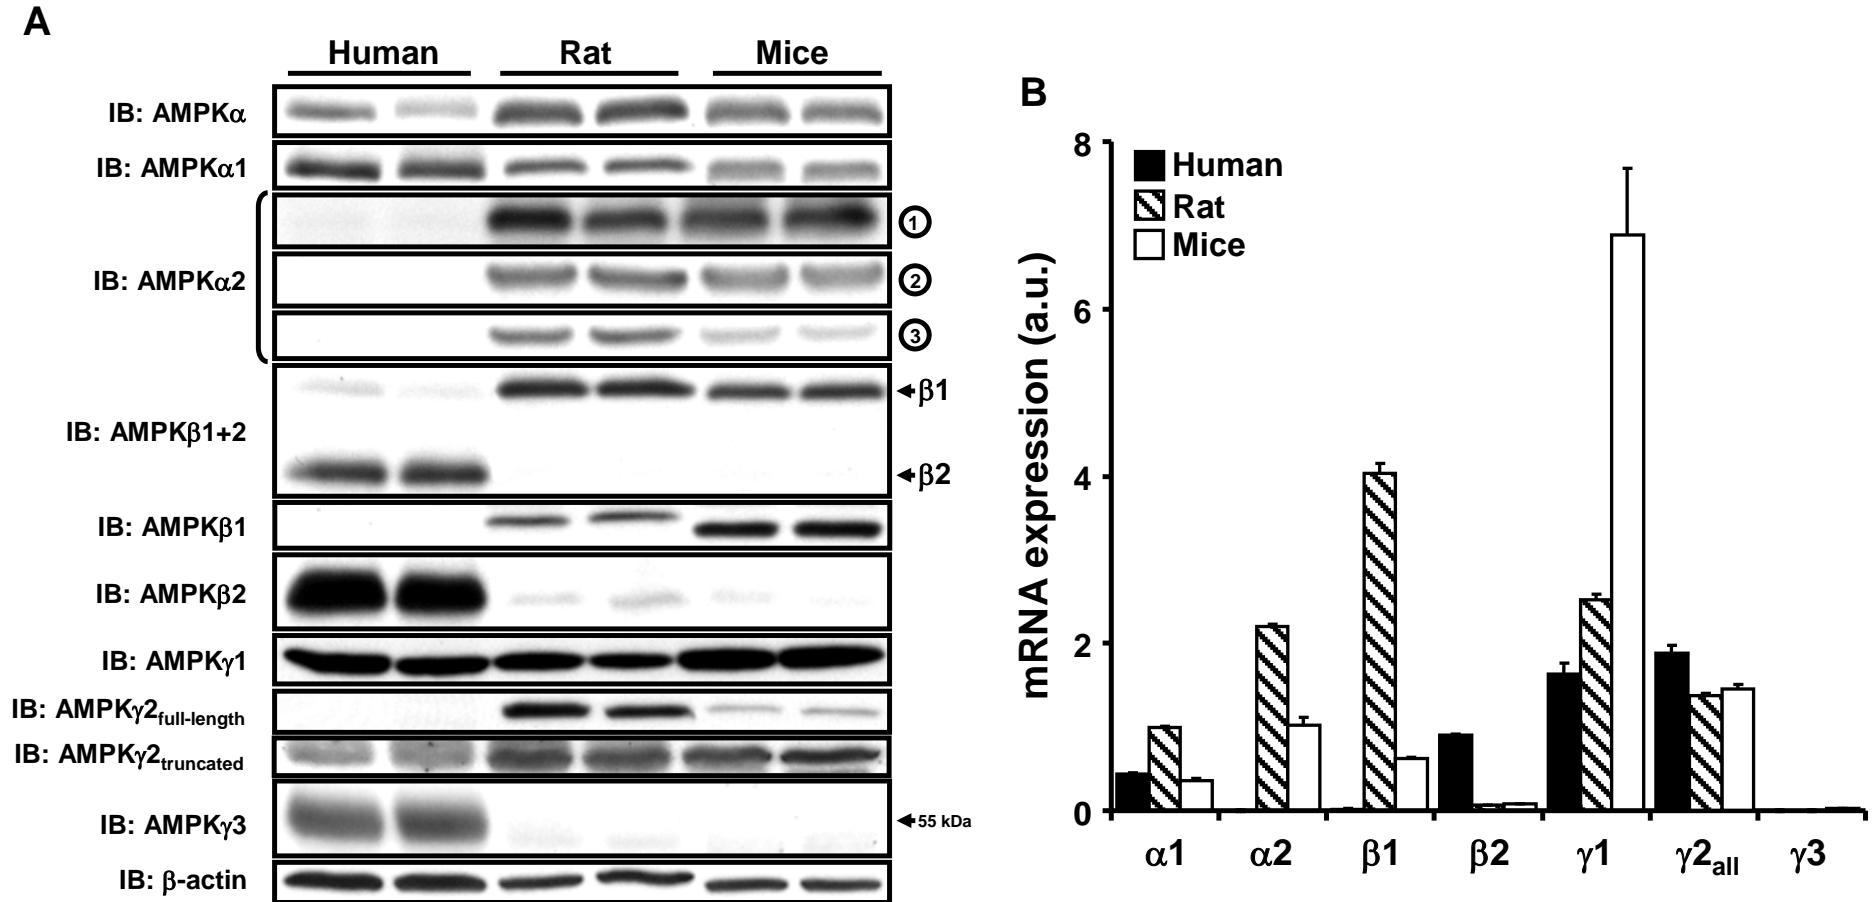

**Supplementary Figure 1: Proteins and mRNA gene expression of AMPK subunits in human, rat and mouse whole livers.** Proteins (A) and mRNA gene expression (B) were determined in whole livers from human (black bars), rat (hatched bars) or mouse (open bars) by western blot and RT-qPCR, respectively. Western blot analysis is representative of 2 separate experiments. The results from RT-qPCR were corrected for *Gapdh* and expressed as means  $\pm$  SEM (n=3).
